# Supplementary material for: Dynamic QTLs for sugars and enzyme activities provide an overview of genetic control of sugar metabolism during peach fruit development
Source: PubMed Central journal article supplement (PMC4892732; doi:10.1093/jxb/erw169), 2016-04-25
Supplement: supp_erw169_supplementary_tables_S1_S2_supplementary_figures_S1_S8.pdf [file supp_erw169_supplementary_tables_S1_S2_supplementary_figures_S1_S8.pdf]

## Dynamic QTLs for sugars and enzyme activities provide an overview of genetic control of sugar metabolism during peach fruit development

Elsa Desnoues, Valentina Baldazzi, Michel Génard, Jehan-Baptiste Mauroux, Patrick Lambert, Carole Confolent, Bénédicte Quilot-Turion

### SUPPLEMENTARY MATERIAL

**Supplementary Table S1:** Characteristics of the genetic linkage maps derived from the BC2 progeny

| Genetic map    | Linkage group | Total # loci <sup>a</sup> | # SNP loci <sup>a</sup> | Total # SNPs | # SNP /locus <sup>a</sup> | # other markers loci <sup>a</sup> | Total # other markers | Map size (cM) | Marker interval (cM) | Physical size (bp) <sup>b</sup> | Coverage (%) <sup>b</sup> |
|----------------|---------------|---------------------------|-------------------------|--------------|---------------------------|-----------------------------------|-----------------------|---------------|----------------------|---------------------------------|---------------------------|
| <i>'DvsS'</i>  |               |                           |                         |              |                           |                                   |                       |               |                      |                                 |                           |
|                | 1             | 67                        | 34                      | 126          | 3.7                       | 33                                | 39                    | 86.5          | 1.29                 | 46,815,236                      | 97.84                     |
|                | 2             | 38                        | 30                      | 122          | 4.1                       | 8                                 | 8                     | 42.7          | 1.12                 | 29,975,404                      | 98.58                     |
|                | 3             | 34                        | 19                      | 64           | 3.4                       | 15                                | 15                    | 55.8          | 1.64                 | 25,756,096                      | 94.11                     |
|                | 4             | 46                        | 26                      | 129          | 5                         | 20                                | 22                    | 56.2          | 1.22                 | 23,489,337                      | 90.89                     |
|                | 5             | 45                        | 28                      | 76           | 2.7                       | 17                                | 17                    | 49.8          | 1.11                 | 17,909,179                      | 96.82                     |
|                | 6             | 42                        | 27                      | 82           | 3                         | 15                                | 15                    | 50.9          | 1.21                 | 28,805,581                      | 93.62                     |
|                | 7             | 38                        | 21                      | 57           | 2.7                       | 17                                | 17                    | 41.2          | 1.08                 | 20,628,629                      | 92.14                     |
|                | 8             | 30                        | 24                      | 85           | 3.5                       | 6                                 | 6                     | 36.9          | 1.23                 | 20,415,896                      | 90.44                     |
|                | <b>Total</b>  | <b>340</b>                | <b>209</b>              | <b>741</b>   | <b>3.5</b>                | <b>131</b>                        | <b>139</b>            | <b>420</b>    | <b>1.24</b>          | <b>213,795,364</b>              | <b>94.73</b>              |
| <i>'SNP_Z'</i> |               |                           |                         |              |                           |                                   |                       |               |                      |                                 |                           |
|                | 1             | 7                         | 7                       | 24           | 3.4                       | NA                                | NA                    | 53.7          | 7.67                 | 26,754,694                      | 55.91                     |
|                | 2             | 7                         | 7                       | 182          | 26                        | NA                                | NA                    | 9.2           | 1.31                 | 8,410,254                       | 2.77                      |
|                | 3             | 18                        | 18                      | 60           | 3.3                       | NA                                | NA                    | 52            | 2.89                 | 23,061,269                      | 84.26                     |
|                | 4             | 32                        | 32                      | 90           | 2.8                       | NA                                | NA                    | 79            | 2.47                 | 22,788,046                      | 88.18                     |
|                | 5             | 3                         | 3                       | 27           | 9                         | NA                                | NA                    | 1.9           | 0.63                 | 752,765                         | 4.1                       |
|                | 6             | 12                        | 12                      | 57           | 4.7                       | NA                                | NA                    | 68.1          | 5.67                 | 28,111,784                      | 91.37                     |
|                | 7             | 26                        | 26                      | 82           | 3.2                       | NA                                | NA                    | 65.6          | 2.52                 | 19,566,416                      | 87.39                     |
|                | 8             | 12                        | 12                      | 71           | 5.9                       | NA                                | NA                    | 60.2          | 5.02                 | 20,784,965                      | 92.07                     |
|                | <b>Total</b>  | <b>117</b>                | <b>117</b>              | <b>593</b>   | <b>7.3</b>                | <b>NA</b>                         | <b>NA</b>             | <b>389.7</b>  | <b>3.33</b>          | <b>150,230,193</b>              | <b>66.56</b>              |

<sup>a</sup>Locus: a single position on the genetic linkage map in which several markers may co-segregate

<sup>b</sup>Physical size and coverage: as compared to peach genome v2.0 pseudo-molecules ([http://www.rosaceae.org/species/prunus\\_persica/genome\\_v2.0.a1](http://www.rosaceae.org/species/prunus_persica/genome_v2.0.a1))

**Supplementary Table S2:** Description of the genes shown on Figure 2.

| Name           | Ch   | Position min | Position max | Annotation          |
|----------------|------|--------------|--------------|---------------------|
| Prupe.4G127100 | Pp01 | 735953       | 738511       | Sugar transporter   |
| Prupe.5G006600 | Pp01 | 743305       | 745863       | Sugar transporter   |
| Prupe.1G156800 | Pp01 | 2732518      | 2736240      | Sugar transporter   |
| Prupe.1G057900 | Pp01 | 4111842      | 4114761      | SDH                 |
| Prupe.1G058000 | Pp01 | 4118992      | 4119839      | Invertase           |
| Prupe.8G224500 | Pp01 | 5020692      | 5023003      | Sugar transporter   |
| Prupe.6G151200 | Pp01 | 6690069      | 6695852      | Sugar transporter   |
| Prupe.1G105400 | Pp01 | 8475392      | 8477731      | Invertase inhibitor |
| Prupe.1G111800 | Pp01 | 8933938      | 8938072      | Invertase           |
| Prupe.1G113800 | Pp01 | 9041293      | 9042145      | Invertase inhibitor |
| Prupe.1G114500 | Pp01 | 9074127      | 9074847      | Invertase inhibitor |
| Prupe.1G118800 | Pp01 | 9314174      | 9315654      | Invertase inhibitor |
| Prupe.1G123500 | Pp01 | 9684058      | 9686184      | Invertase inhibitor |
| Prupe.1G123700 | Pp01 | 9741098      | 9743331      | Invertase inhibitor |
| Prupe.1G123800 | Pp01 | 9751037      | 9753234      | Invertase inhibitor |
| Prupe.1G131700 | Pp01 | 10355300     | 10373098     | SuSy                |
| Prupe.1G131900 | Pp01 | 10381907     | 10384156     | Invertase inhibitor |
| Prupe.1G132000 | Pp01 | 10387303     | 10389594     | Invertase inhibitor |
| Prupe.1G132300 | Pp01 | 10419659     | 10421796     | Invertase inhibitor |
| Prupe.2G118600 | Pp01 | 11370367     | 11374044     | Sugar transporter   |
| Prupe.3G066300 | Pp01 | 11381808     | 11385053     | Sugar transporter   |
| Prupe.4G127400 | Pp01 | 12052878     | 12057897     | Sugar transporter   |
| Prupe.8G248500 | Pp01 | 12234605     | 12235403     | Sugar transporter   |
| Prupe.1G189900 | Pp01 | 12352148     | 12357396     | Sugar transporter   |
| Prupe.7G186000 | Pp01 | 12361223     | 12363662     | Sugar transporter   |
| Prupe.4G008400 | Pp01 | 12364066     | 12366369     | Sugar transporter   |
| Prupe.1G157000 | Pp01 | 12380623     | 12383155     | Sugar transporter   |
| Prupe.2G001700 | Pp01 | 12421965     | 12424261     | Sugar transporter   |
| Prupe.2G315500 | Pp01 | 12425073     | 12427509     | Sugar transporter   |
| Prupe.3G034900 | Pp01 | 12439287     | 12442722     | Sugar transporter   |
| Prupe.1G514700 | Pp01 | 12447680     | 12450686     | Sugar transporter   |
| Prupe.1G159700 | Pp01 | 12702147     | 12709396     | SPS                 |
| Prupe.1G178400 | Pp01 | 15304141     | 15307207     | Invertase inhibitor |
| Prupe.8G248600 | Pp01 | 17192664     | 17203398     | Sugar transporter   |
| Prupe.8G052700 | Pp01 | 17553687     | 17560142     | Sugar transporter   |
| Prupe.1G196700 | Pp01 | 18768317     | 18771430     | FK                  |
| Prupe.7G148900 | Pp01 | 18768317     | 18771430     | Sugar transporter   |
| Prupe.7G236300 | Pp01 | 23533967     | 23536346     | Sugar transporter   |
| Prupe.1G222100 | Pp01 | 23632798     | 23636823     | G6PDH               |
| Prupe.7G236300 | Pp01 | 25769320     | 25772751     | Sugar transporter   |
| Prupe.1G249100 | Pp01 | 26159090     | 26159866     | Invertase inhibitor |
| Prupe.1G271500 | Pp01 | 27843811     | 27849253     | Sucrose transporter |
| Prupe.7G253400 | Pp01 | 27843811     | 27849253     | Sugar transporter   |
| Prupe.1G329200 | Pp01 | 31268448     | 31271163     | PGM                 |

|                |      |          |          |                     |
|----------------|------|----------|----------|---------------------|
| Prupe.1G330700 | Pp01 | 31353882 | 31359327 | PGM                 |
| Prupe.1G330800 | Pp01 | 31360037 | 31362451 | Invertase inhibitor |
| Prupe.1G330900 | Pp01 | 31370947 | 31371869 | Invertase inhibitor |
| Prupe.1G365400 | Pp01 | 33537122 | 33539832 | Invertase           |
| Prupe.1G366000 | Pp01 | 33563784 | 33567154 | HK                  |
| Prupe.1G376200 | Pp01 | 34094935 | 34099233 | AGPase              |
| Prupe.1G378500 | Pp01 | 34198014 | 34202992 | Sugar transporter   |
| Prupe.1G380500 | Pp01 | 34311725 | 34319938 | PGI                 |
| Prupe.8G101500 | Pp01 | 34383389 | 34385937 | Sugar transporter   |
| Prupe.1G444000 | Pp01 | 37629021 | 37632743 | PFK                 |
| Prupe.8G105600 | Pp01 | 40215648 | 40219569 | Sugar transporter   |
| Prupe.1G488700 | Pp01 | 40683210 | 40693558 | UGPase              |
| Prupe.6G059800 | Pp01 | 40683210 | 40693558 | Sugar transporter   |
| Prupe.5G006300 | Pp01 | 41486624 | 41488426 | Sugar transporter   |
| Prupe.1G501300 | Pp01 | 42463956 | 42470112 | Sugar transporter   |
| Prupe.1G528400 | Pp01 | 43236123 | 43241935 | PGI                 |
| Prupe.1G529400 | Pp01 | 43300109 | 43302153 | Invertase inhibitor |
| Prupe.1G529500 | Pp01 | 43306345 | 43308503 | Invertase inhibitor |
| Prupe.1G542000 | Pp01 | 44273773 | 44281717 | Sucrose transporter |
| Prupe.1G070900 | Pp01 | 44341545 | 44347181 | Sugar transporter   |
| Prupe.1G556900 | Pp01 | 45464916 | 45471252 | Invertase           |
| Prupe.1G560800 | Pp01 | 45786677 | 45788261 | F16BPase            |
| Prupe.8G105300 | Pp01 | 47452615 | 47454370 | Sugar transporter   |
| Prupe.3G156900 | Pp02 | 254326   | 261608   | Sugar transporter   |
| Prupe.2G024100 | Pp02 | 2399702  | 2400551  | Sugar transporter   |
| Prupe.1G481800 | Pp02 | 3850627  | 3861624  | Sugar transporter   |
| Prupe.5G114600 | Pp02 | 3872019  | 3883568  | Sugar transporter   |
| Prupe.2G042500 | Pp02 | 4646622  | 4650777  | Sugar transporter   |
| Prupe.2G058200 | Pp02 | 7236001  | 7241012  | Invertase inhibitor |
| Prupe.2G058300 | Pp02 | 7240338  | 7242234  | Invertase inhibitor |
| Prupe.2G075000 | Pp02 | 11444370 | 11449689 | Invertase           |
| Prupe.2G083900 | Pp02 | 13283820 | 13288728 | Invertase           |
| Prupe.2G099900 | Pp02 | 15585362 | 15588499 | Invertase inhibitor |
| Prupe.2G100200 | Pp02 | 15598310 | 15600150 | Invertase inhibitor |
| Prupe.2G100500 | Pp02 | 15624210 | 15626339 | Invertase inhibitor |
| Prupe.2G107500 | Pp02 | 16489359 | 16498039 | UGPase              |
| Prupe.2G115600 | Pp02 | 17346686 | 17347455 | Invertase inhibitor |
| Prupe.2G325500 | Pp02 | 17666417 | 17669913 | Sugar transporter   |
| Prupe.2G245600 | Pp02 | 17786619 | 17790424 | Sugar transporter   |
| Prupe.8G224400 | Pp02 | 17795220 | 17802381 | Sugar transporter   |
| Prupe.2G141000 | Pp02 | 19741431 | 19744411 | Invertase inhibitor |
| Prupe.2G141200 | Pp02 | 19754635 | 19757309 | Invertase inhibitor |
| Prupe.2G141800 | Pp02 | 19788161 | 19788802 | Invertase inhibitor |
| Prupe.2G151100 | Pp02 | 20597751 | 20600680 | FK                  |
| Prupe.5G006100 | Pp02 | 22325621 | 22328702 | Sugar transporter   |
| Prupe.2G191400 | Pp02 | 23073519 | 23078158 | Invertase           |

|                |      |          |          |                     |
|----------------|------|----------|----------|---------------------|
| Prupe.2G191500 | Pp02 | 23086423 | 23089255 | Invertase           |
| Prupe.8G100900 | Pp02 | 23645962 | 23647161 | Sugar transporter   |
| Prupe.2G210700 | Pp02 | 24336961 | 24339341 | Invertase inhibitor |
| Prupe.2G213100 | Pp02 | 24488528 | 24494820 | PGM                 |
| Prupe.2G242300 | Pp02 | 26135523 | 26137574 | SuSy                |
| Prupe.4G127600 | Pp02 | 26274645 | 26275987 | Sugar transporter   |
| Prupe.2G245700 | Pp02 | 26276979 | 26281137 | F16BPase            |
| Prupe.2G253500 | Pp02 | 26681048 | 26687711 | UGPase              |
| Prupe.1G144900 | Pp02 | 27381468 | 27382915 | Sugar transporter   |
| Prupe.2G272600 | Pp02 | 27574029 | 27579251 | PFK                 |
| Prupe.2G274100 | Pp02 | 27657485 | 27659539 | Sugar transporter   |
| Prupe.8G253500 | Pp02 | 27663409 | 27665736 | Sugar transporter   |
| Prupe.2G277900 | Pp02 | 27860807 | 27865049 | Invertase           |
| Prupe.2G278200 | Pp02 | 27882912 | 27884981 | Invertase inhibitor |
| Prupe.2G278300 | Pp02 | 27886643 | 27888606 | Invertase inhibitor |
| Prupe.2G279700 | Pp02 | 27936617 | 27937883 | Invertase inhibitor |
| Prupe.2G279800 | Pp02 | 27940209 | 27941321 | Invertase inhibitor |
| Prupe.2G279900 | Pp02 | 27943416 | 27944548 | Invertase inhibitor |
| Prupe.5G090900 | Pp02 | 28195368 | 28196655 | Sugar transporter   |
| Prupe.2G286900 | Pp02 | 28284289 | 28289943 | PGM                 |
| Prupe.2G287100 | Pp02 | 28297724 | 28301506 | FK                  |
| Prupe.5G146500 | Pp02 | 28297724 | 28301506 | Sugar transporter   |
| Prupe.2G288800 | Pp02 | 28363713 | 28365855 | SDH                 |
| Prupe.1G156300 | Pp02 | 29182160 | 29184160 | Sugar transporter   |
| Prupe.8G017400 | Pp02 | 29228674 | 29229557 | Sugar transporter   |
| Prupe.2G310600 | Pp02 | 29383444 | 29387138 | Invertase inhibitor |
| Prupe.2G307700 | Pp02 | 30075681 | 30080804 | Sugar transporter   |
| Prupe.1G187700 | Pp02 | 30201632 | 30205095 | Sugar transporter   |
| Prupe.3G003700 | Pp03 | 248619   | 251553   | Invertase inhibitor |
| Prupe.3G007700 | Pp03 | 471754   | 472278   | Invertase inhibitor |
| Prupe.3G007800 | Pp03 | 474999   | 475518   | Invertase inhibitor |
| Prupe.3G007900 | Pp03 | 476936   | 477537   | Invertase inhibitor |
| Prupe.3G008000 | Pp03 | 477978   | 478274   | Invertase inhibitor |
| Prupe.3G009500 | Pp03 | 606163   | 610062   | Invertase           |
| Prupe.3G014100 | Pp03 | 1010886  | 1015717  | SuSy                |
| Prupe.3G015000 | Pp03 | 1069857  | 1077800  | UGPase              |
| Prupe.3G027200 | Pp03 | 2015795  | 2020810  | Sugar transporter   |
| Prupe.3G031000 | Pp03 | 2300979  | 2311223  | Invertase inhibitor |
| Prupe.1G133300 | Pp03 | 2550134  | 2551429  | Sugar transporter   |
| Prupe.3G048300 | Pp03 | 3405921  | 3409831  | Invertase           |
| Prupe.3G056600 | Pp03 | 4017399  | 4024584  | PFK                 |
| Prupe.3G057800 | Pp03 | 4096447  | 4101575  | HK                  |
| Prupe.6G224200 | Pp03 | 4773175  | 4781004  | Sugar transporter   |
| Prupe.1G155000 | Pp03 | 5103365  | 5104285  | Sugar transporter   |
| Prupe.1G542000 | Pp03 | 6836304  | 6839968  | Sugar transporter   |
| Prupe.3G144600 | Pp03 | 15757313 | 15764258 | Sugar transporter   |

|                |      |          |          |                     |
|----------------|------|----------|----------|---------------------|
| Prupe.3G146800 | Pp03 | 16038192 | 16038906 | Invertase inhibitor |
| Prupe.1G038600 | Pp03 | 16048486 | 16049516 | Sugar transporter   |
| Prupe.3G152800 | Pp03 | 16644957 | 16648119 | Sugar transporter   |
| Prupe.2G307800 | Pp03 | 17531732 | 17535222 | Sugar transporter   |
| Prupe.3G160500 | Pp03 | 17922917 | 17932622 | FK                  |
| Prupe.1G271500 | Pp03 | 17922917 | 17932622 | Sugar transporter   |
| Prupe.3G192600 | Pp03 | 20466452 | 20470025 | AGPase              |
| Prupe.3G198600 | Pp03 | 20821071 | 20825286 | G6PDH               |
| Prupe.3G211400 | Pp03 | 21629154 | 21633616 | Sugar transporter   |
| Prupe.3G211800 | Pp03 | 21648145 | 21653335 | PFK                 |
| Prupe.8G101200 | Pp03 | 25751273 | 25753667 | Sugar transporter   |
| Prupe.3G300000 | Pp03 | 26516741 | 26517831 | PGI                 |
| Prupe.3G300200 | Pp03 | 26531676 | 26537007 | G6PDH               |
| Prupe.3G312600 | Pp03 | 27071117 | 27075186 | F26BPase            |
| Prupe.4G001200 | Pp04 | 131826   | 132365   | Invertase inhibitor |
| Prupe.4G002000 | Pp04 | 164366   | 168836   | PFK                 |
| Prupe.7G223700 | Pp04 | 426241   | 429137   | Sugar transporter   |
| Prupe.4G014600 | Pp04 | 671854   | 676945   | PFK                 |
| Prupe.4G025200 | Pp04 | 1195495  | 1198231  | Invertase inhibitor |
| Prupe.5G128400 | Pp04 | 1255928  | 1258763  | Sugar transporter   |
| Prupe.5G125100 | Pp04 | 2015166  | 2019155  | Sugar transporter   |
| Prupe.3G152800 | Pp04 | 2020923  | 2022326  | Sugar transporter   |
| Prupe.4G072300 | Pp04 | 3536606  | 3538975  | Sugar transporter   |
| Prupe.4G073700 | Pp04 | 3599032  | 3604715  | UGPase              |
| Prupe.8G020100 | Pp04 | 4096771  | 4100129  | Sugar transporter   |
| Prupe.4G115400 | Pp04 | 6203523  | 6211118  | UGPase              |
| Prupe.6G331800 | Pp04 | 6982370  | 6984007  | Sugar transporter   |
| Prupe.4G127200 | Pp04 | 6987171  | 6992153  | Sugar transporter   |
| Prupe.1G516200 | Pp04 | 7020285  | 7023162  | Sugar transporter   |
| Prupe.4G136700 | Pp04 | 7583583  | 7586022  | F16BPase            |
| Prupe.4G083700 | Pp04 | 8912151  | 8916616  | Sugar transporter   |
| Prupe.4G008300 | Pp04 | 8922957  | 8926748  | Sugar transporter   |
| Prupe.7G185800 | Pp04 | 12106768 | 12111636 | Sugar transporter   |
| Prupe.4G206400 | Pp04 | 12882369 | 12883999 | Invertase           |
| Prupe.4G240300 | Pp04 | 15817263 | 15820307 | SDH                 |
| Prupe.4G256200 | Pp04 | 17960292 | 17966684 | HK                  |
| Prupe.7G247800 | Pp04 | 18369144 | 18376596 | Sugar transporter   |
| Prupe.5G001900 | Pp05 | 311315   | 318463   | SPP                 |
| Prupe.5G003400 | Pp05 | 464208   | 470729   | PFK                 |
| Prupe.1G156700 | Pp05 | 696032   | 698833   | Sugar transporter   |
| Prupe.6G183300 | Pp05 | 717190   | 722649   | Sugar transporter   |
| Prupe.5G024000 | Pp05 | 2681142  | 2681904  | Invertase           |
| Prupe.5G083900 | Pp05 | 3092369  | 3095364  | Sugar transporter   |
| Prupe.5G046300 | Pp05 | 4993486  | 4998570  | PGM                 |
| Prupe.5G048600 | Pp05 | 5172883  | 5173482  | Invertase inhibitor |
| Prupe.5G048900 | Pp05 | 5183213  | 5183993  | Invertase inhibitor |

|                |      |          |          |                           |
|----------------|------|----------|----------|---------------------------|
| Prupe.5G075600 | Pp05 | 8955357  | 8959521  | Invertase                 |
| Prupe.5G076800 | Pp05 | 9091326  | 9092648  | Invertase inhibitor       |
| Prupe.5G076900 | Pp05 | 9094726  | 9096486  | Invertase inhibitor       |
| Prupe.7G185700 | Pp05 | 9648862  | 9651237  | Sugar transporter         |
| Prupe.7G234100 | Pp05 | 9708196  | 9711080  | Sugar transporter         |
| Prupe.2G306600 | Pp05 | 10124114 | 10126399 | Sugar transporter         |
| Prupe.4G197800 | Pp05 | 10161578 | 10163817 | Sugar transporter         |
| Prupe.5G112600 | Pp05 | 11636050 | 11636571 | Invertase inhibitor       |
| Prupe.4G155700 | Pp05 | 11755403 | 11759771 | Sugar transporter         |
| Prupe.5G091100 | Pp05 | 12303785 | 12306940 | Sugar transporter         |
| Prupe.6G187000 | Pp05 | 13449100 | 13451508 | Sugar transporter         |
| Prupe.4G127800 | Pp05 | 13456636 | 13458837 | Sugar transporter         |
| Prupe.5G175500 | Pp05 | 14922045 | 14924558 | Sugar transporter         |
| Prupe.5G189700 | Pp05 | 15581665 | 15582560 | Invertase inhibitor       |
| Prupe.5G234300 | Pp05 | 17778792 | 17791526 | FBPA                      |
| Prupe.5G241700 | Pp05 | 18195911 | 18200676 | SuSy                      |
| Prupe.1G070800 | Pp05 | 18204020 | 18206357 | Sugar transporter         |
| Prupe.6G006600 | Pp06 | 563185   | 564153   | Invertase                 |
| Prupe.6G029500 | Pp06 | 2294425  | 2296969  | FBPA                      |
| Prupe.6G053800 | Pp06 | 3770137  | 3778361  | F26BPase                  |
| Prupe.2G274200 | Pp06 | 4154356  | 4158112  | Sugar transporter         |
| Prupe.4G037800 | Pp06 | 4844200  | 4848466  | Sugar transporter         |
| Prupe.6G072900 | Pp06 | 4977474  | 4978432  | Invertase                 |
| Prupe.6G120100 | Pp06 | 8914315  | 8915814  | PFK                       |
| Prupe.6G122600 | Pp06 | 9128385  | 9135532  | Invertase                 |
| Prupe.1G457700 | Pp06 | 13074689 | 13076679 | Sugar transporter         |
| Prupe.8G181000 | Pp06 | 19048482 | 19052660 | Sugar transporter         |
| Prupe.6G211400 | Pp06 | 19552855 | 19556036 | Sugar transporter         |
| Prupe.6G196200 | Pp06 | 20389671 | 20395970 | PFK                       |
| Prupe.6G197400 | Pp06 | 20457399 | 20457958 | Invertase inhibitor       |
| Prupe.6G212100 | Pp06 | 22040650 | 22043959 | HK                        |
| Prupe.6G229900 | Pp06 | 23318823 | 23320506 | Invertase                 |
| Prupe.6G267900 | Pp06 | 25563295 | 25565896 | Invertase                 |
| Prupe.5G006600 | Pp06 | 25911446 | 25913106 | Sugar transporter         |
| Prupe.1G187700 | Pp06 | 25918556 | 25920954 | Sugar transporter         |
| Prupe.6G291200 | Pp06 | 26864548 | 26869512 | Invertase                 |
| Prupe.6G300000 | Pp06 | 27264692 | 27269055 | glucose catabolic process |
| Prupe.6G307600 | Pp06 | 27709051 | 27713355 | G6PDH                     |
| Prupe.6G309200 | Pp06 | 27789478 | 27790065 | Invertase inhibitor       |
| Prupe.6G309300 | Pp06 | 27791010 | 27791534 | Invertase inhibitor       |
| Prupe.6G309800 | Pp06 | 27815656 | 27819789 | Invertase                 |
| Prupe.6G314000 | Pp06 | 28061726 | 28064959 | Invertase                 |
| Prupe.6G318500 | Pp06 | 28269921 | 28272171 | Invertase inhibitor       |
| Prupe.6G318600 | Pp06 | 28273021 | 28274929 | Invertase inhibitor       |
| Prupe.1G554800 | Pp06 | 28633939 | 28638942 | Sugar transporter         |
| Prupe.6G358900 | Pp06 | 28639579 | 28644548 | Sugar transporter         |

|                |      |          |          |                     |
|----------------|------|----------|----------|---------------------|
| Prupe.6G355900 | Pp06 | 30204408 | 30206428 | Sugar transporter   |
| Prupe.1G156400 | Pp06 | 30511085 | 30516493 | Sugar transporter   |
| Prupe.7G003700 | Pp07 | 400727   | 403494   | UGPase              |
| Prupe.7G089300 | Pp07 | 12296588 | 12300677 | SPP                 |
| Prupe.7G103200 | Pp07 | 13285991 | 13289044 | Invertase           |
| Prupe.7G103300 | Pp07 | 13293841 | 13296921 | Invertase           |
| Prupe.7G103400 | Pp07 | 13299771 | 13304593 | Invertase           |
| Prupe.7G116500 | Pp07 | 14159140 | 14162122 | FBPA                |
| Prupe.7G116600 | Pp07 | 14164351 | 14167758 | FBPA                |
| Prupe.4G127300 | Pp07 | 16096653 | 16099920 | Sugar transporter   |
| Prupe.7G165400 | Pp07 | 16968676 | 16970735 | FBPA                |
| Prupe.8G077700 | Pp07 | 17989443 | 17991978 | Sugar transporter   |
| Prupe.1G220700 | Pp07 | 17993351 | 17994662 | Sugar transporter   |
| Prupe.6G070700 | Pp07 | 17997535 | 18000948 | Sugar transporter   |
| Prupe.7G190300 | Pp07 | 18243290 | 18246068 | Invertase inhibitor |
| Prupe.7G190400 | Pp07 | 18247144 | 18249472 | Invertase inhibitor |
| Prupe.7G190500 | Pp07 | 18250054 | 18252735 | Invertase inhibitor |
| Prupe.7G190700 | Pp07 | 18257407 | 18260068 | Invertase inhibitor |
| Prupe.7G192300 | Pp07 | 18350215 | 18356360 | SuSy                |
| Prupe.7G192400 | Pp07 | 18357081 | 18359221 | Invertase inhibitor |
| Prupe.7G193700 | Pp07 | 18416980 | 18418060 | Invertase inhibitor |
| Prupe.7G216700 | Pp07 | 19574975 | 19578477 | PFK                 |
| Prupe.7G218800 | Pp07 | 19677704 | 19682250 | HK                  |
| Prupe.8G017500 | Pp07 | 19920028 | 19923317 | Sugar transporter   |
| Prupe.7G231500 | Pp07 | 20281792 | 20283590 | Sugar transporter   |
| Prupe.1G584600 | Pp07 | 20283858 | 20286176 | Sugar transporter   |
| Prupe.5G027100 | Pp07 | 20396555 | 20400978 | Sugar transporter   |
| Prupe.1G144800 | Pp07 | 20518944 | 20520963 | Sugar transporter   |
| Prupe.1G156500 | Pp07 | 21041784 | 21046678 | Sugar transporter   |
| Prupe.7G249900 | Pp07 | 21151882 | 21157785 | SuSy                |
| Prupe.2G274300 | Pp07 | 21354476 | 21357899 | Sugar transporter   |
| Prupe.7G270900 | Pp07 | 22198854 | 22202036 | AGPase              |
| Prupe.8G248700 | Pp07 | 22198854 | 22202036 | Sugar transporter   |
| Prupe.8G000700 | Pp08 | 98079    | 100368   | FK                  |
| Prupe.8G003700 | Pp08 | 302873   | 308259   | SPS                 |
| Prupe.8G076100 | Pp08 | 1630354  | 1632521  | Sugar transporter   |
| Prupe.4G042700 | Pp08 | 1834704  | 1842366  | Sugar transporter   |
| Prupe.8G028300 | Pp08 | 2566771  | 2570494  | F16BPase            |
| Prupe.8G038100 | Pp08 | 3725038  | 3725754  | Invertase inhibitor |
| Prupe.8G052700 | Pp08 | 5814548  | 5818369  | Sucrose transporter |
| Prupe.1G156900 | Pp08 | 5814548  | 5818369  | Sugar transporter   |
| Prupe.8G070500 | Pp08 | 10340602 | 10343542 | F16BPase            |
| Prupe.3G071100 | Pp08 | 11181030 | 11190565 | Sugar transporter   |
| Prupe.1G156600 | Pp08 | 11690795 | 11697592 | Sugar transporter   |
| Prupe.8G085100 | Pp08 | 11812456 | 11815003 | FBPA                |
| Prupe.8G093900 | Pp08 | 12662374 | 12667895 | AGPase              |

|                |      |          |          |                     |
|----------------|------|----------|----------|---------------------|
| Prupe.8G100700 | Pp08 | 13186354 | 13188881 | Sugar transporter   |
| Prupe.7G231600 | Pp08 | 13225762 | 13228930 | Sugar transporter   |
| Prupe.1G038700 | Pp08 | 13264239 | 13266782 | Sugar transporter   |
| Prupe.3G283400 | Pp08 | 13618253 | 13620401 | Sugar transporter   |
| Prupe.8G105400 | Pp08 | 13645519 | 13647838 | Sugar transporter   |
| Prupe.8G105500 | Pp08 | 13658102 | 13660508 | Sugar transporter   |
| Prupe.8G101000 | Pp08 | 13699428 | 13701967 | Sugar transporter   |
| Prupe.8G142900 | Pp08 | 15994437 | 15996971 | SDH                 |
| Prupe.8G143000 | Pp08 | 15999040 | 16001622 | SDH                 |
| Prupe.8G159800 | Pp08 | 16872814 | 16878303 | Invertase           |
| Prupe.2G266200 | Pp08 | 17164258 | 17169245 | Sugar transporter   |
| Prupe.8G180600 | Pp08 | 18110291 | 18114880 | Sugar transporter   |
| Prupe.8G052700 | Pp08 | 20532425 | 20537087 | Sugar transporter   |
| Prupe.2G001700 | Pp08 | 21474403 | 21479245 | Sugar transporter   |
| Prupe.7G152100 | Pp08 | 21479443 | 21483871 | Sugar transporter   |
| Prupe.5G146400 | Pp08 | 21697139 | 21698821 | Sugar transporter   |
| Prupe.8G261300 | Pp08 | 22064410 | 22065375 | Invertase inhibitor |
| Prupe.8G263900 | Pp08 | 22159222 | 22161846 | Invertase inhibitor |
| Prupe.8G264000 | Pp08 | 22164915 | 22167229 | Invertase inhibitor |
| Prupe.8G264100 | Pp08 | 22169289 | 22173300 | Invertase inhibitor |
| Prupe.8G264300 | Pp08 | 22179197 | 22184773 | SuSy                |
| Prupe.8G267500 | Pp08 | 22322926 | 22325983 | Invertase inhibitor |



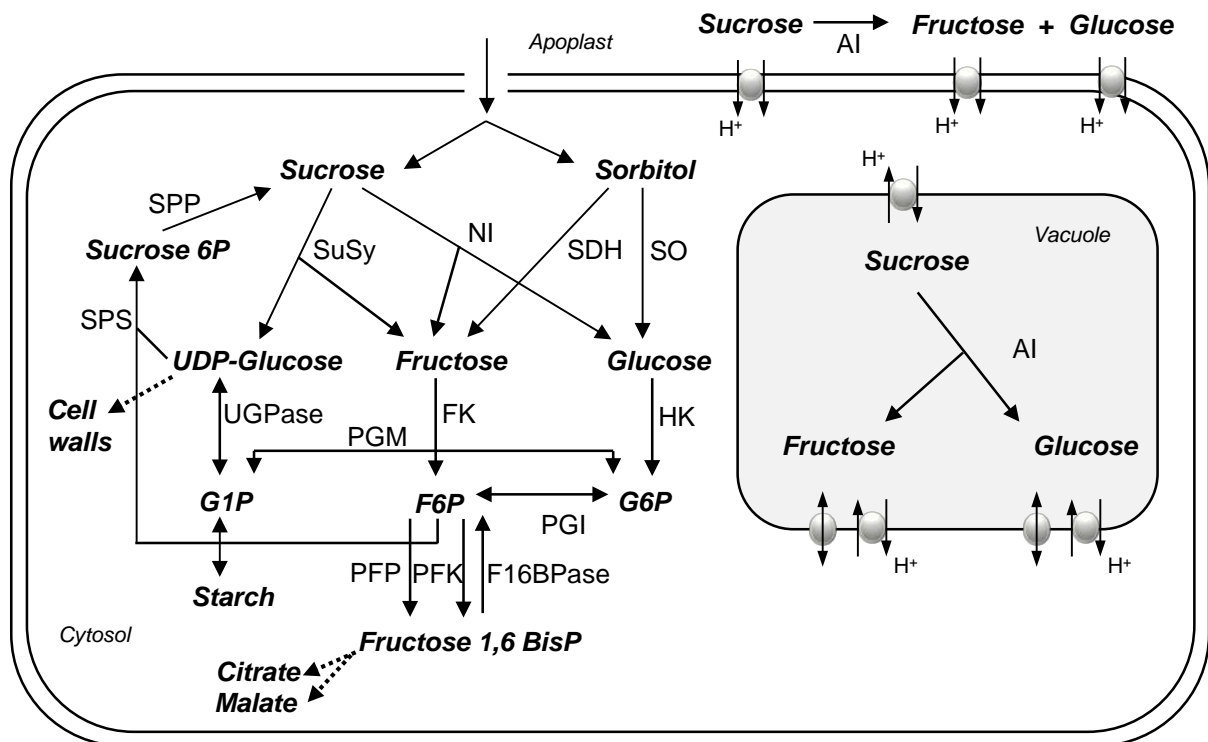

**Supplementary Figure S1:** Peach sugar metabolism. Abbreviations: acid invertase (AI), fructose-1,6-bisphosphatase (F16BPase), fructose-6-phosphate (F6P), fructokinase (FK), glucose-1-phosphate (G1P), glucose-6-phosphate (G6P), hexokinase (HK), neutral invertase (NI), ATP-phosphofructokinase (PFK), phosphoglucose isomerase (PGI), phosphoglucomutase (PGM), sorbitol dehydrogenase (SDH), PPi-phosphofructokinase (PFP), sorbitol oxidase (SO), sucrose-phosphate phosphatase (SPP), sucrose phosphate synthase (SPS), sucrose (Suc), sucrose synthase (SuSy), and UDP-glucose pyrophosphorylase (UGPase).

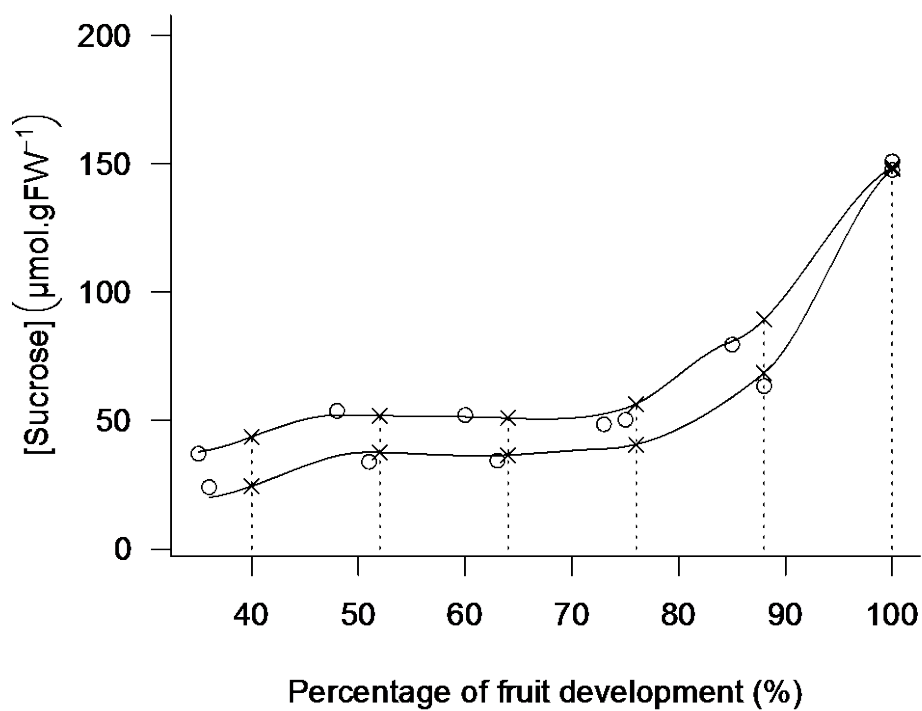

**Supplementary Figure S2:** Example of rescaling data: sucrose concentration ( $\mu\text{mol.gFW}^{-1}$ ) during fruit development (in %) for two genotypes. Circles correspond to measured data for the two genotypes and cross correspond to the extracted data used for QTL analyses for the common percentage of fruit development at 40, 52, 64, 76, 88 and 100%.

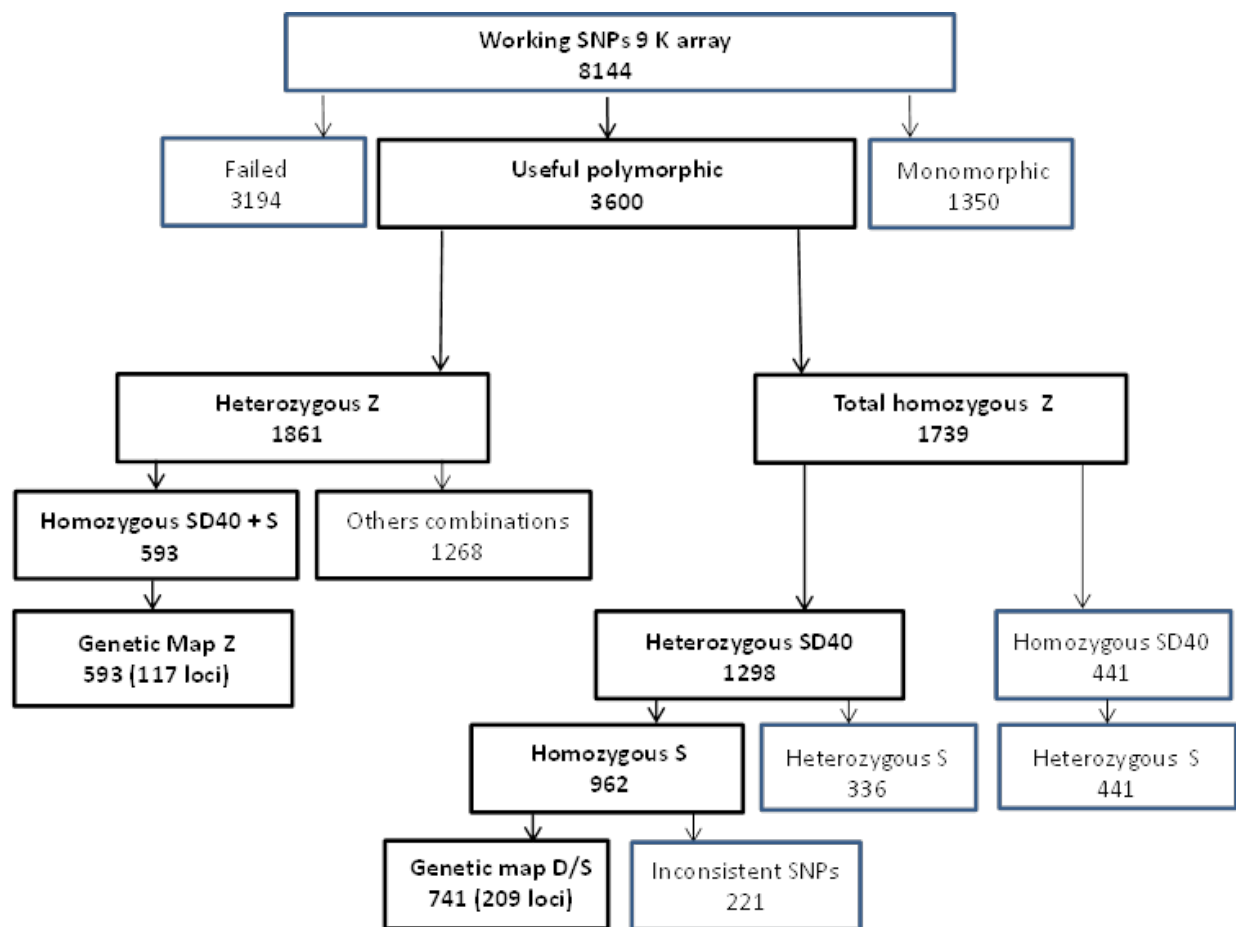

**Supplementary Figure S3:** Flow chart of the filtering procedure performed to select SNPs that were useful for the construction of the 'DvsS' and the 'SNP\_Z' maps. Steps leading to each map are in bold.

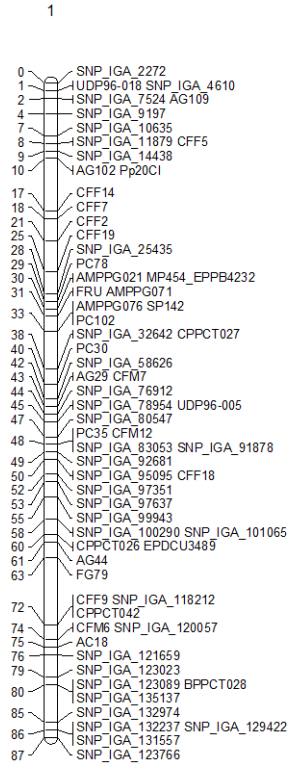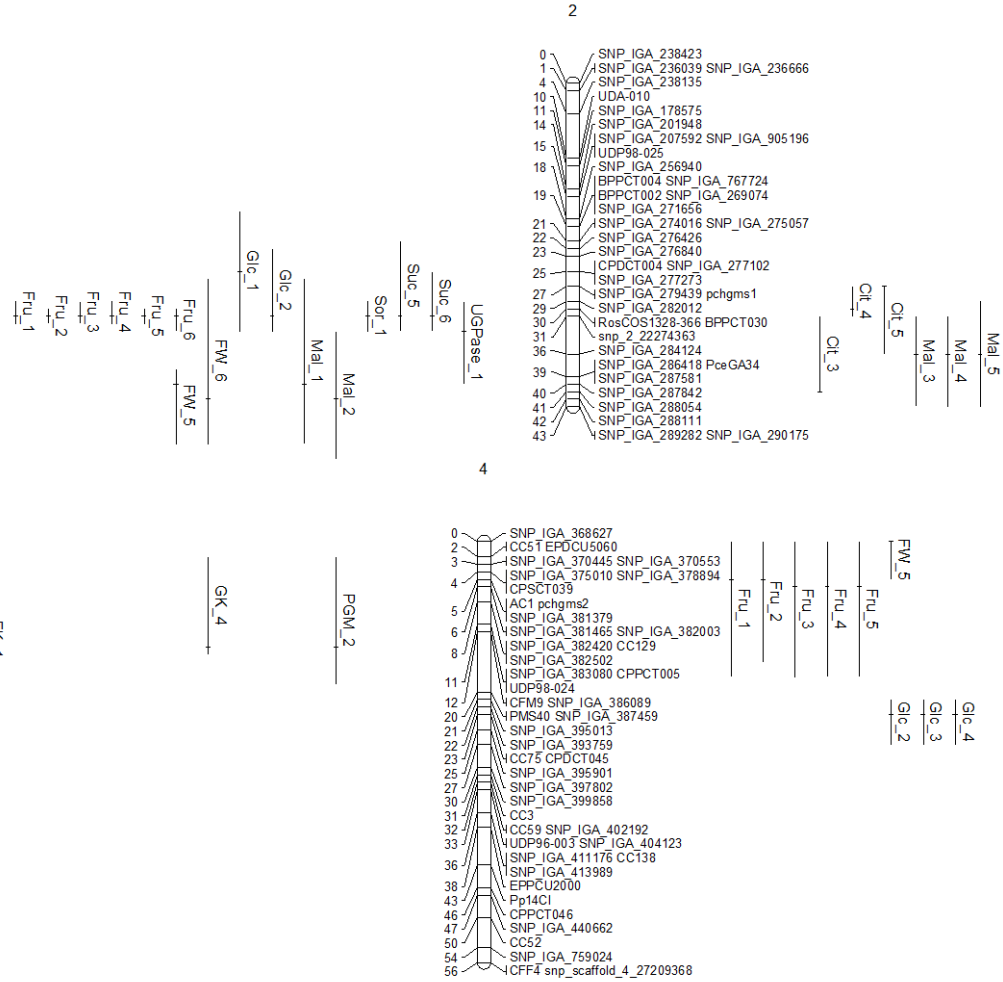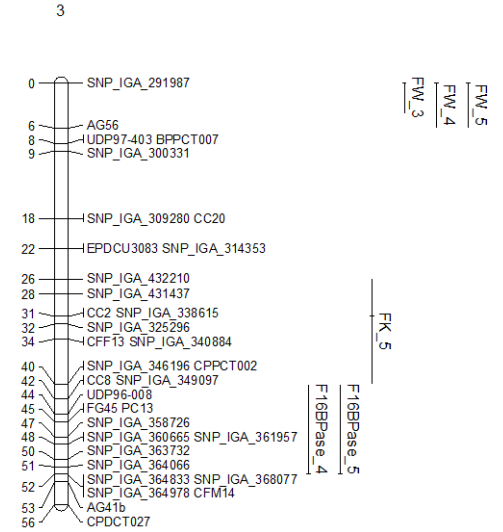

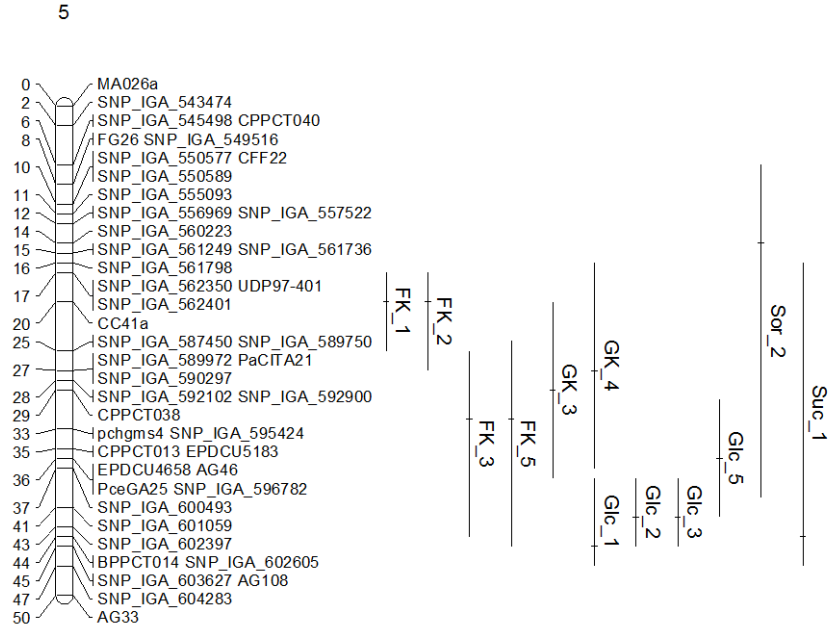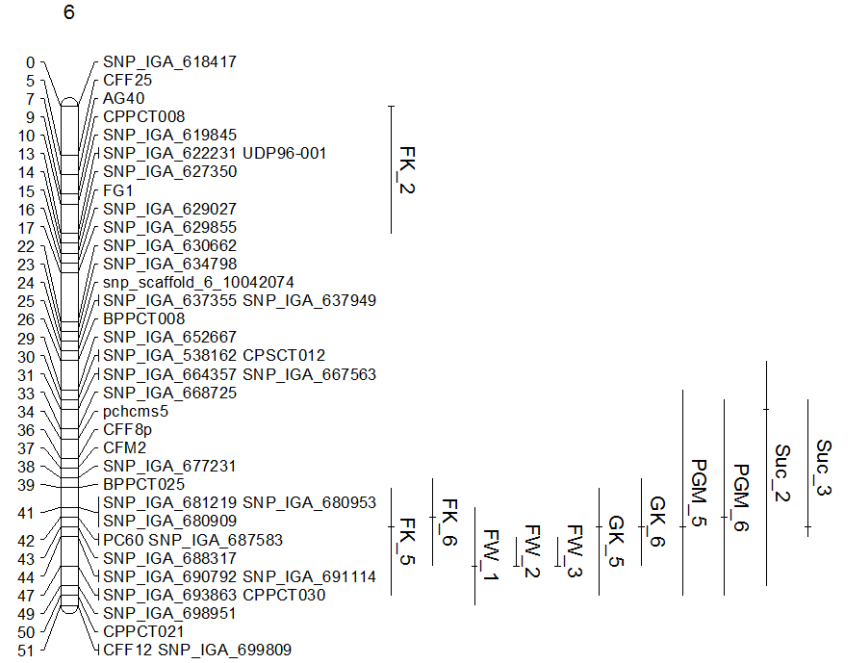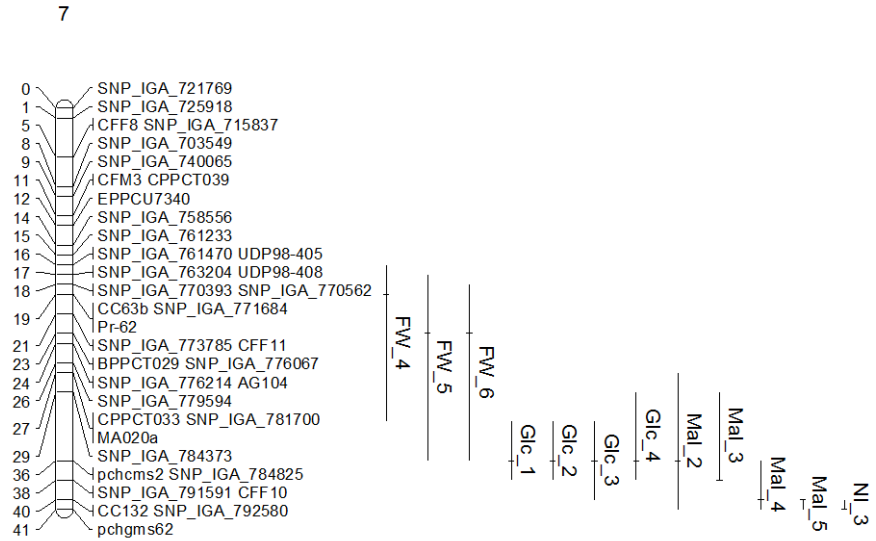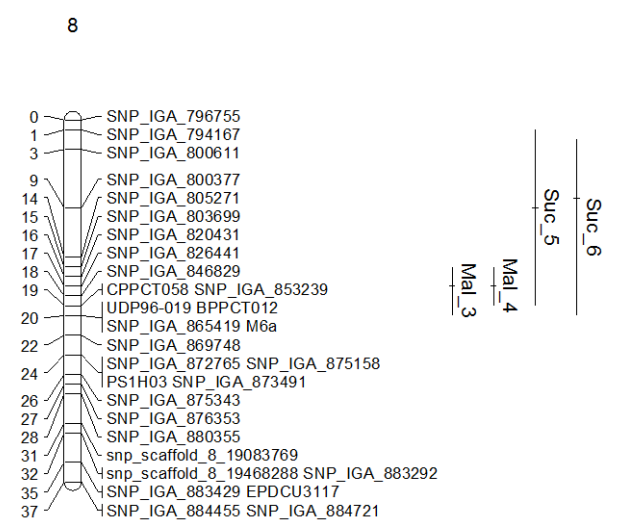

**Supplementary Figure S4:** Location on the genetic map 'DvsS' (cM) of the QTLs related to the 19 traits studied. Abbreviations: acid invertase (AI), citrate (Cit), fructose-1,6-bisphosphatase (F16BPase), fructokinase (FK), fructose (Fru), fresh weight (FW), glucose (Glc), hexokinase (HK), malate (Mal), neutral invertase (NI), ATP-phosphofructokinase (PFK), phosphoglucomutase (PGM), sorbitol dehydrogenase (SDH), sorbitol oxidase (SO), sucrose phosphate synthase (SPS), sorbitol (Sor), sucrose (Suc), sucrose synthase (SuSy), and UDP-glucose pyrophosphorylase (UGPase). The numbers following the trait names refer to the stages at which the QTL was detected (1 refers to 40% of development, 2 to 52%, 3 to 64%, 4 to 76%, 5 to 88% and 6 to 100%).

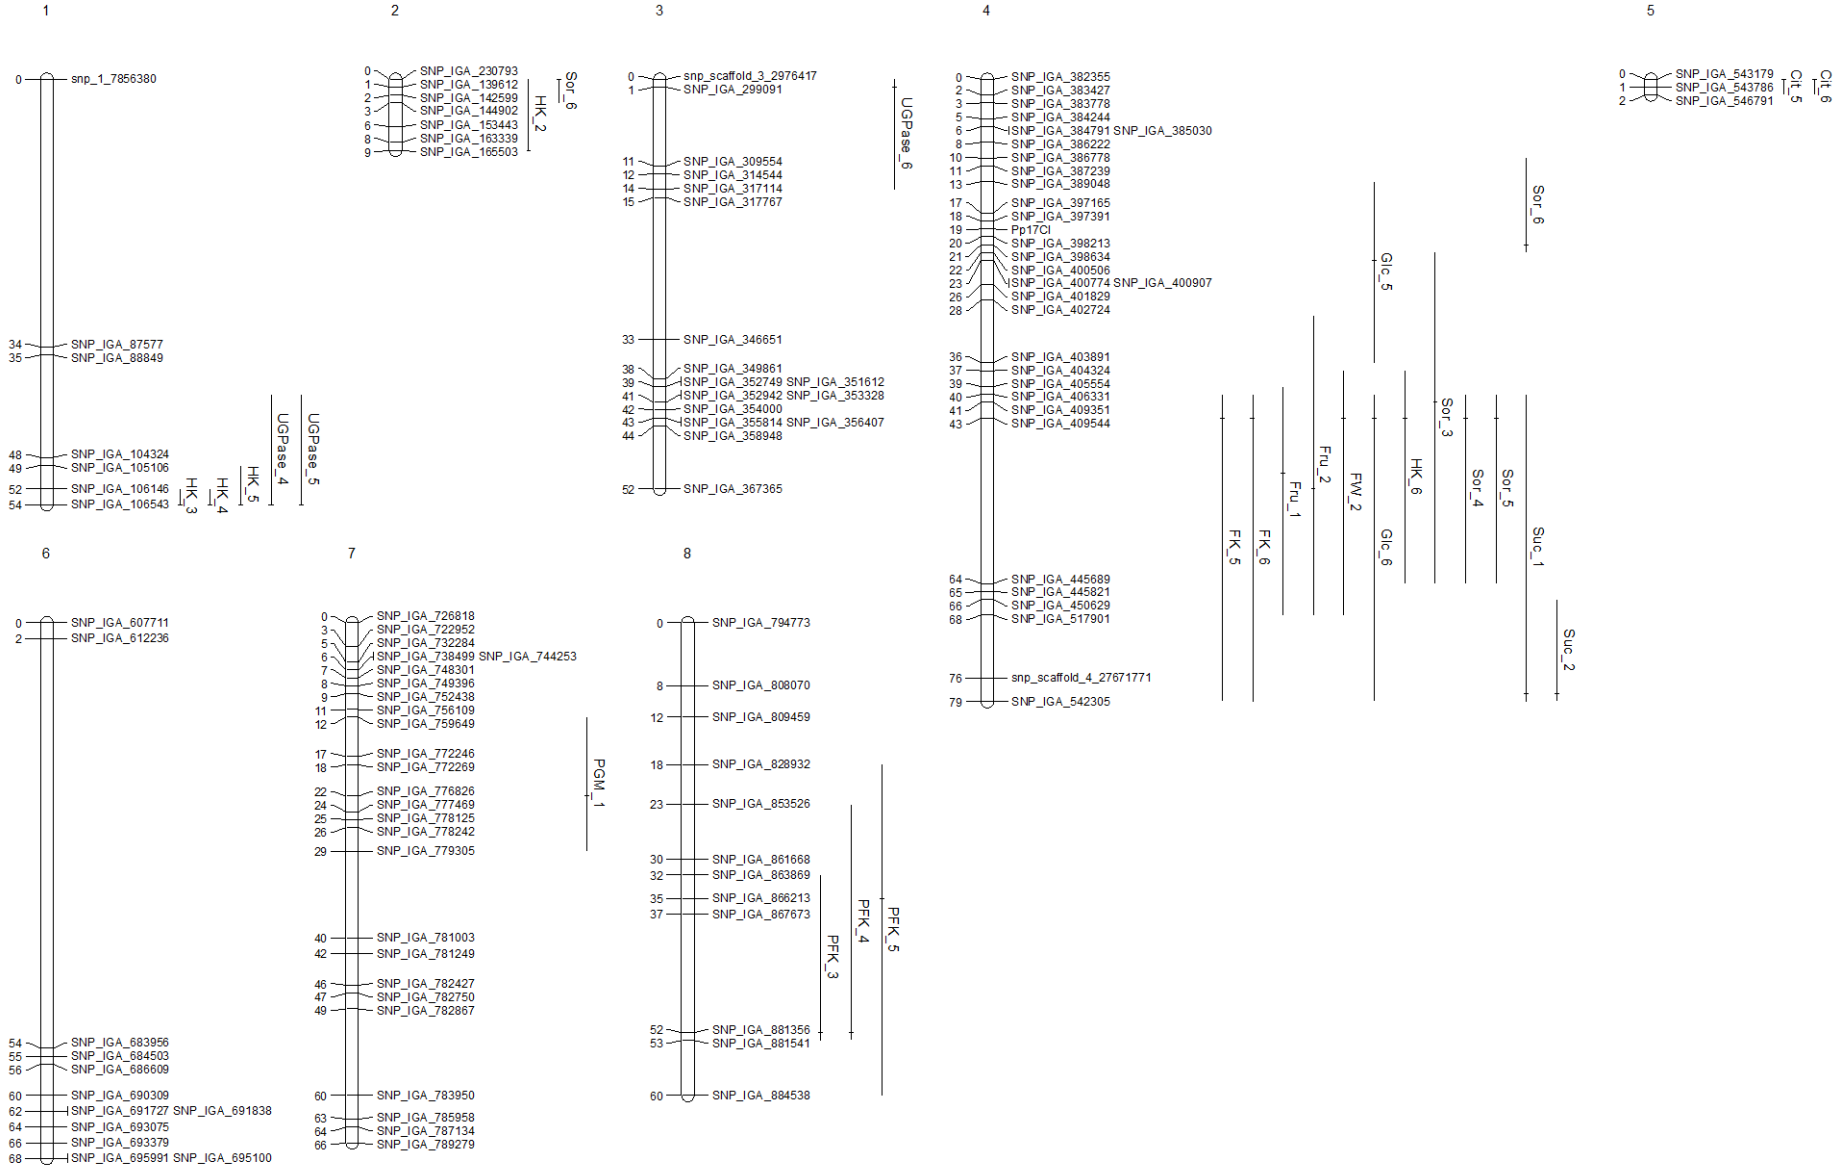

**Supplementary Figure S5:** Location on the genetic 'SNP\_Z' map (cM) of the QTLs related to the 19 traits studied. Abbreviations: acid invertase (AI), citrate (Cit), fructose-1,6-bisphosphatase (F16BPase), fructokinase (FK), fructose (Fru), fresh weight (FW), glucose (Glc), hexokinase (HK), malate (Mal), neutral invertase (NI), ATP-phosphofructokinase (PFK), phosphoglucomutase (PGM), sorbitol dehydrogenase (SDH), sorbitol oxidase (SO), sucrose phosphate synthase (SPS), sorbitol (Sor), sucrose (Suc), sucrose synthase (SuSy), and UDP-glucose pyrophosphorylase (UGPase). The numbers following the trait names refer to the stages at which the QTL was detected (1 refers to 40% of development, 2 to 52%, 3 to 64%, 4 to 76%, 5 to 88% and 6 to 100%).



**a**

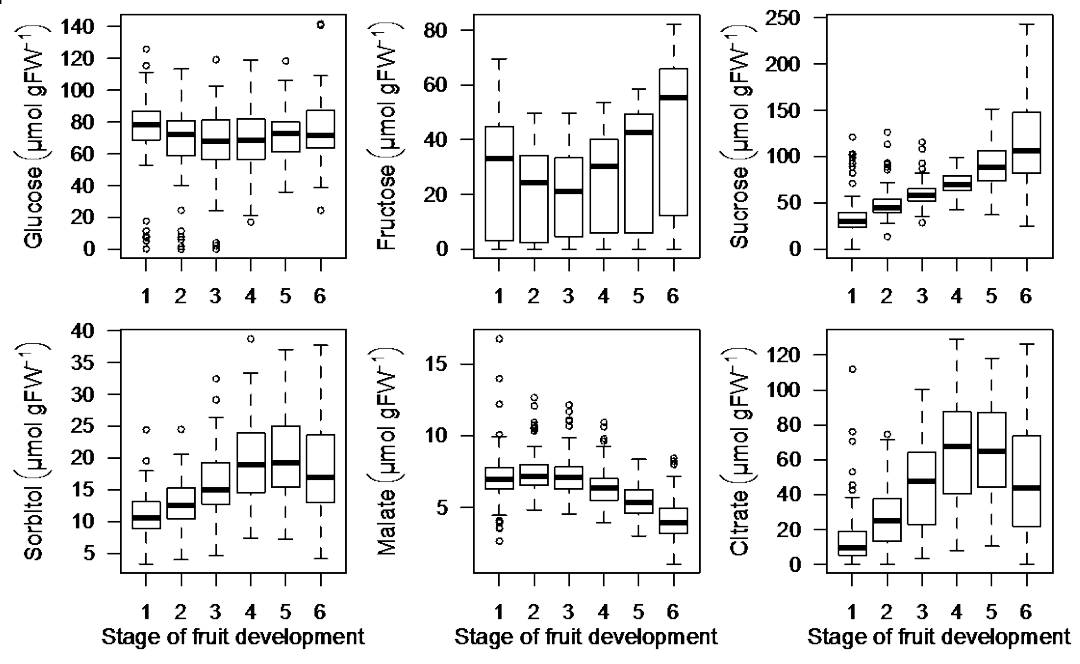

**b**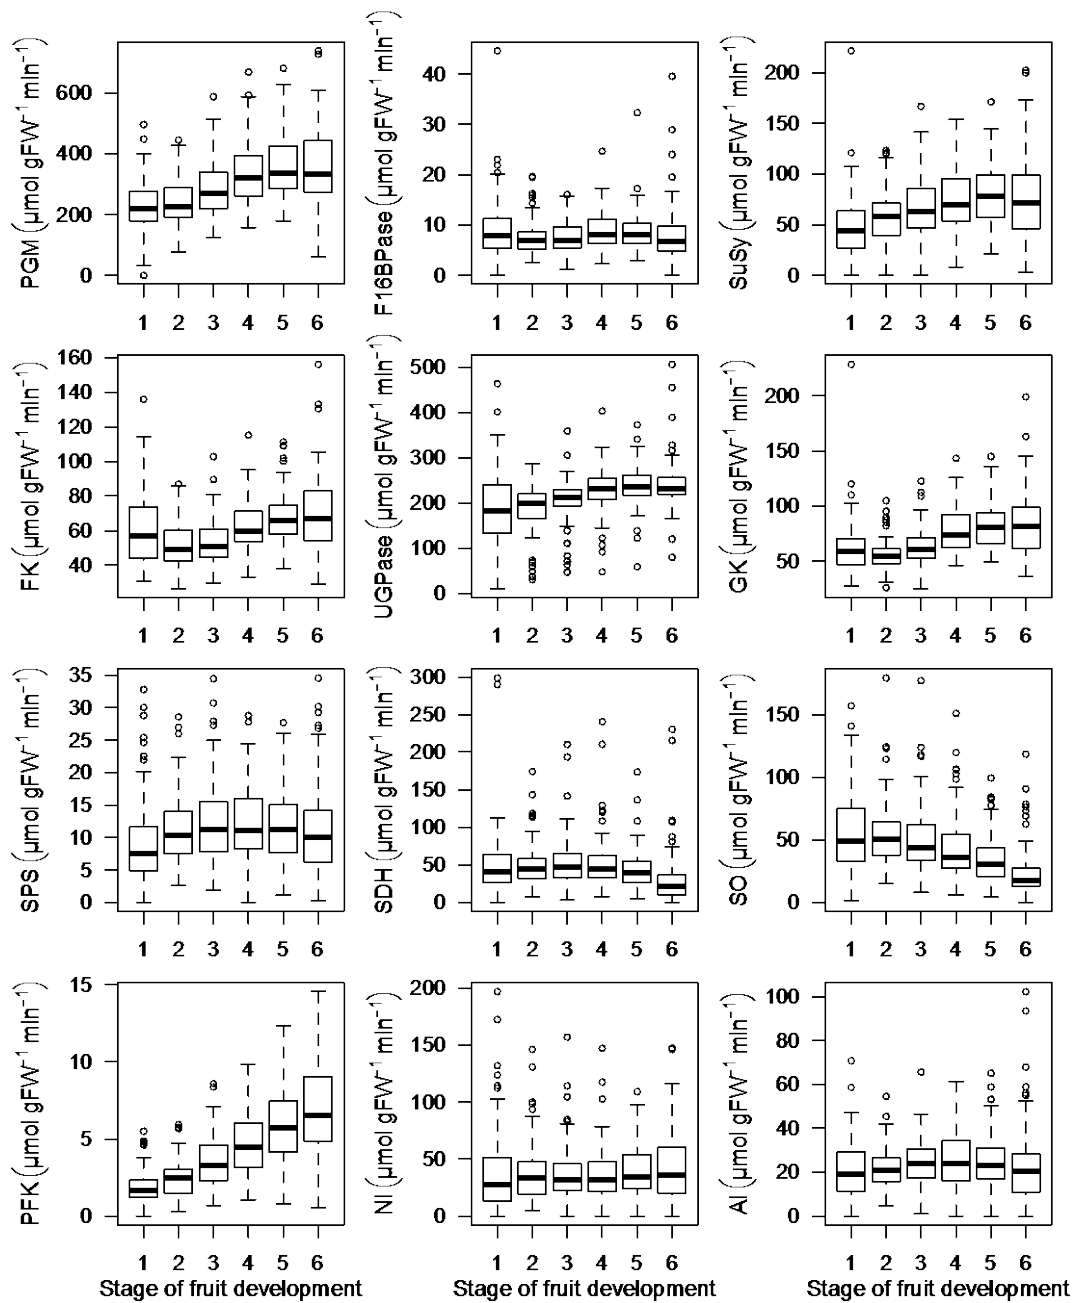**c**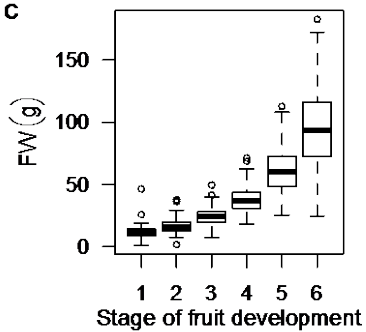

**Supplementary Figure S6:** Boxplots of (a) sugar and acid concentrations ( $\mu\text{mol.gFW}^{-1}$ ), (b) enzymatic capacities ( $\mu\text{mol.gFW}^{-1}\text{min}^{-1}$ ) and (c) fresh weight (FW (g)) at the 6 stages of fruit development for all genotypes studied.

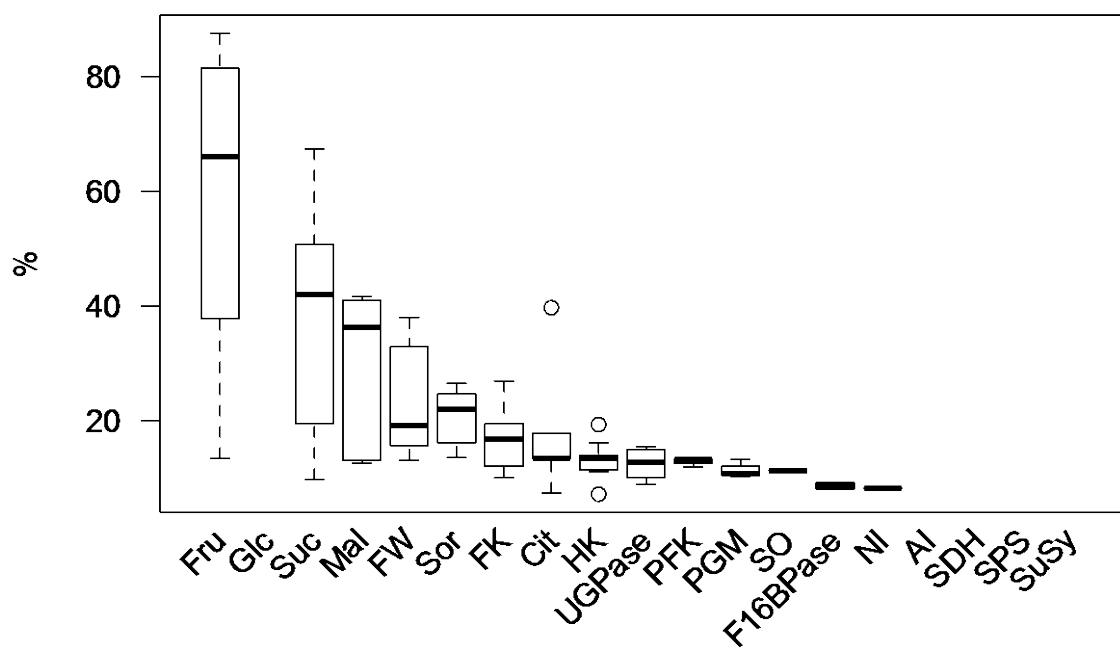

**Supplementary Figure S7:** Distribution of the total percentage of trait phenotypic variation explained by all of the QTLs detected for a trait. For each trait, the different results come from the different analyses (the six different stages and the two maps). Abbreviations: fructose (Fru), glucose (Glc), sucrose (Suc), malate (Mal), citrate (Cit), sorbitol (Sor), fresh weight (FW), sorbitol dehydrogenase (SDH), fructokinase (FK), UDP-glucose pyrophosphorylase (UGPase), hexokinase (HK), fructose-1,6-bisphosphatase (F16BPase), ATP-phosphofructokinase (PFK), and phosphoglucomutase (PGM), sucrose phosphate synthase (SPS).

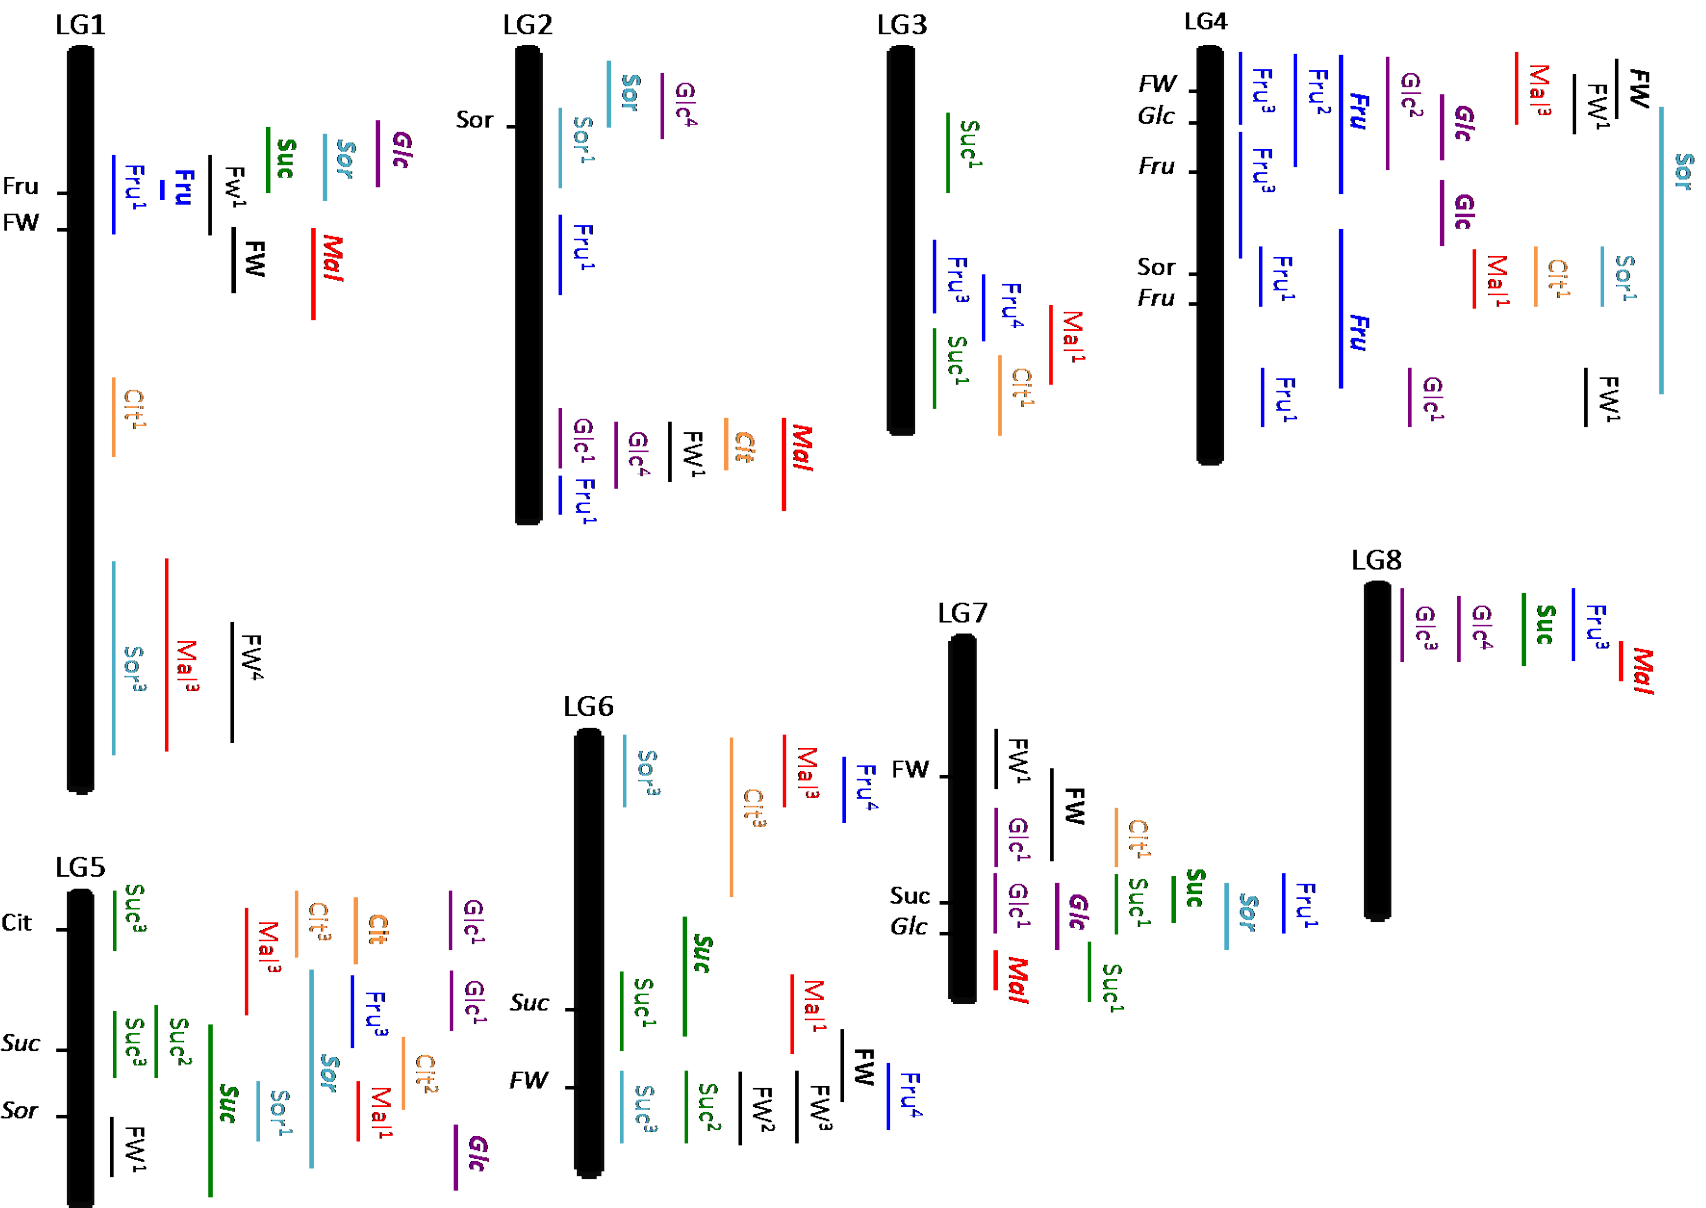

**Supplementary Figure S8:** Schematic representation of QTLs for sugar, acid and fresh weight from the literature reported together with QTLs from the present study. QTLs from the present study are represented in bold and QTLs that are not detected at maturity are represented in italics. Co-locations between QTLs detected in this study and in previous studies are indicated in the left side of the linkage group (LG). Abbreviations: fructose (Fru), glucose (Glc), sucrose (Suc), malate (Mal), citrate (Cit), sorbitol (Sor), and fresh weight (FW).<sup>1</sup> (Quilot *et al.* 2004), <sup>2</sup> (Etienne *et al.* 2002), <sup>3</sup> (Dirlewanger *et al.* 1999), <sup>4</sup> (Sosinki *et al.* 1998). The population studied in <sup>1</sup> (Quilot *et al.* 2004) is the same as that used in the present study.
